# Supplementary material for: Src activates retrograde membrane traffic through phosphorylation of GBF1
Source: PubMed Central journal article supplement (PMC8727025; doi:10.7554/elife.68678), 2021-12-06
Supplement: elife-68678-supp1.pdf [file elife-68678-supp1.pdf]

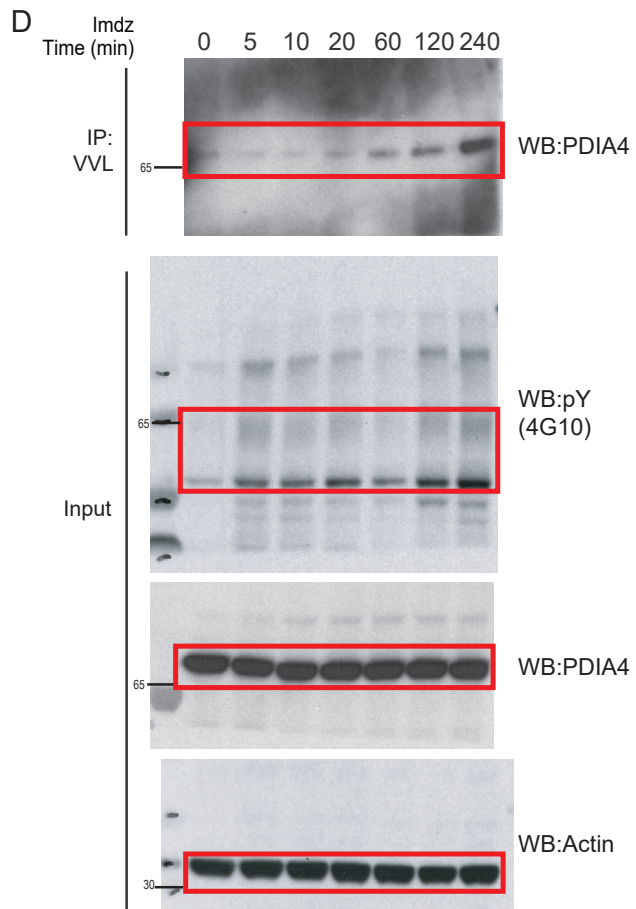

Figure 1

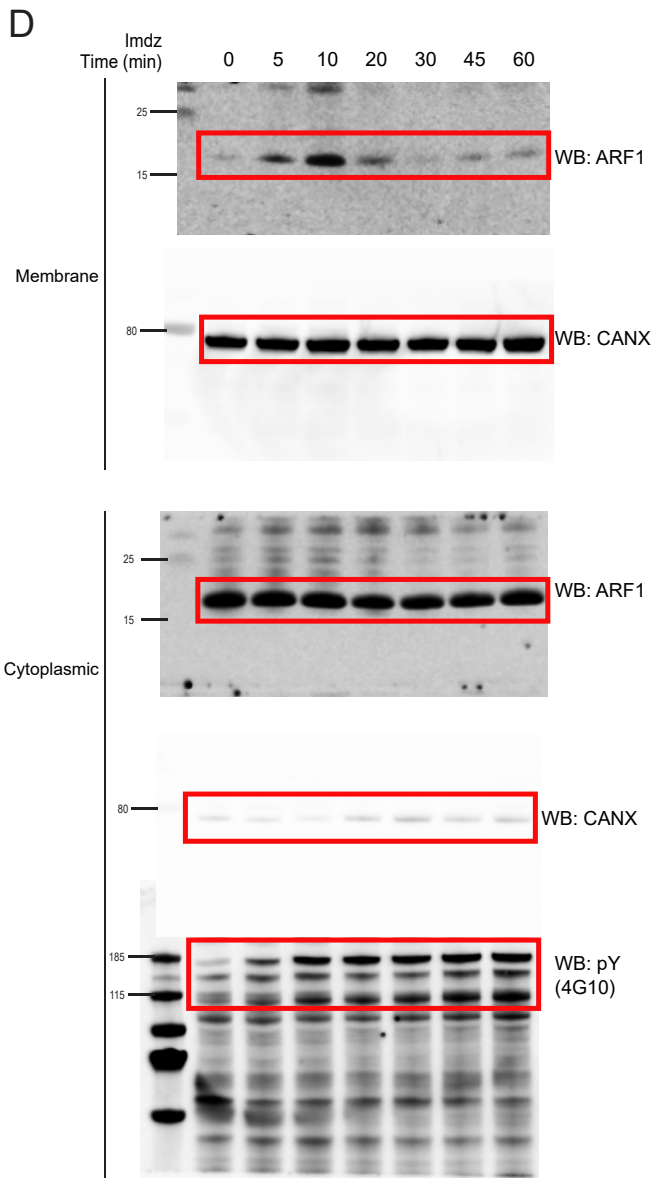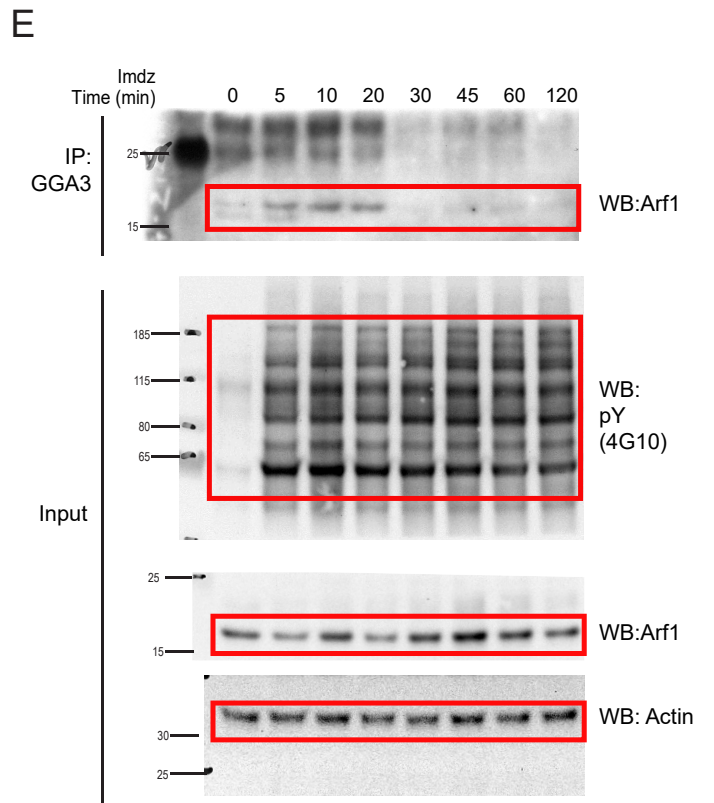

Figure 2

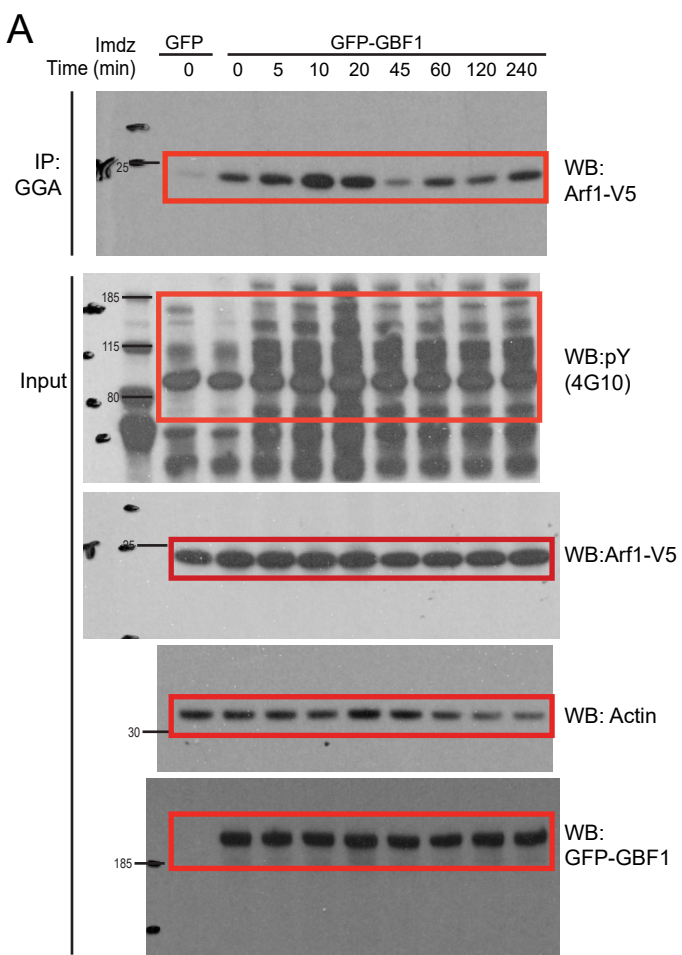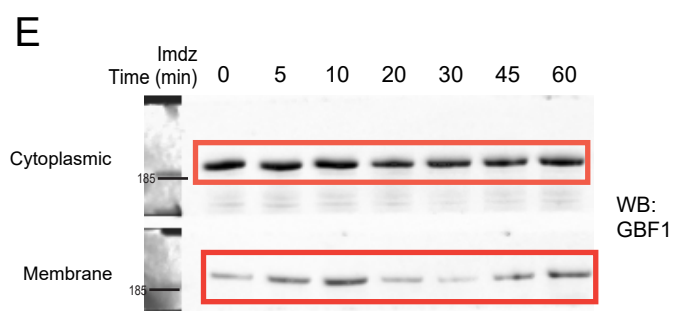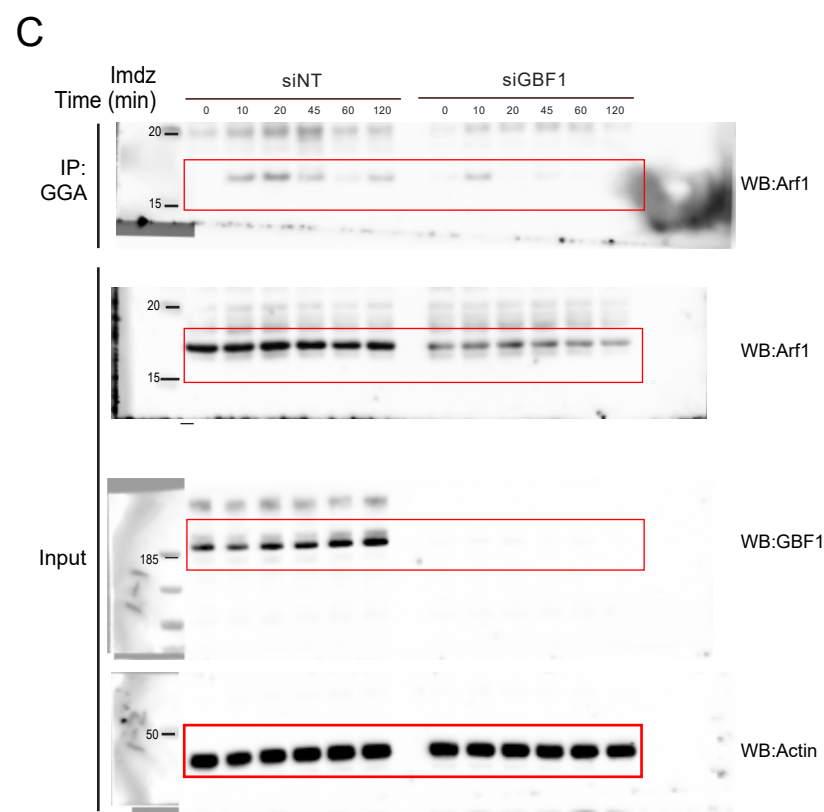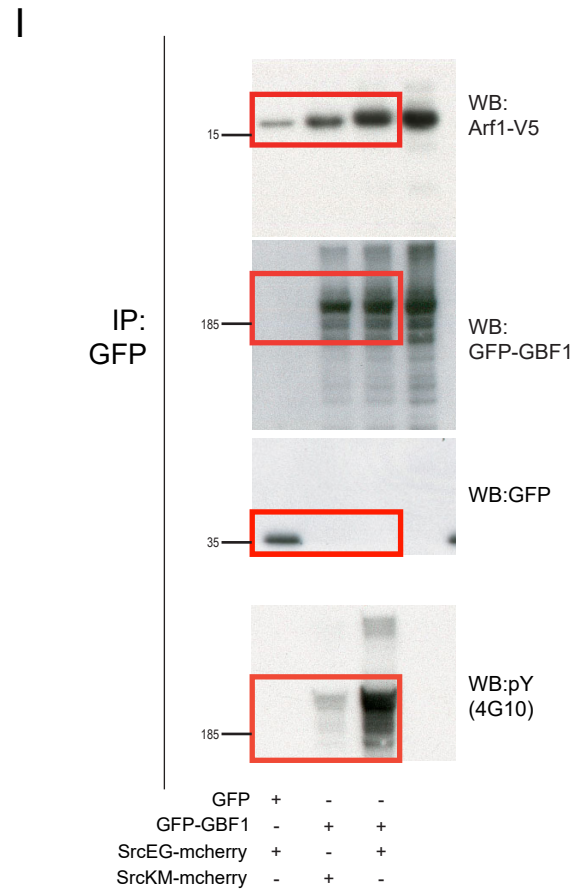

Figure 3

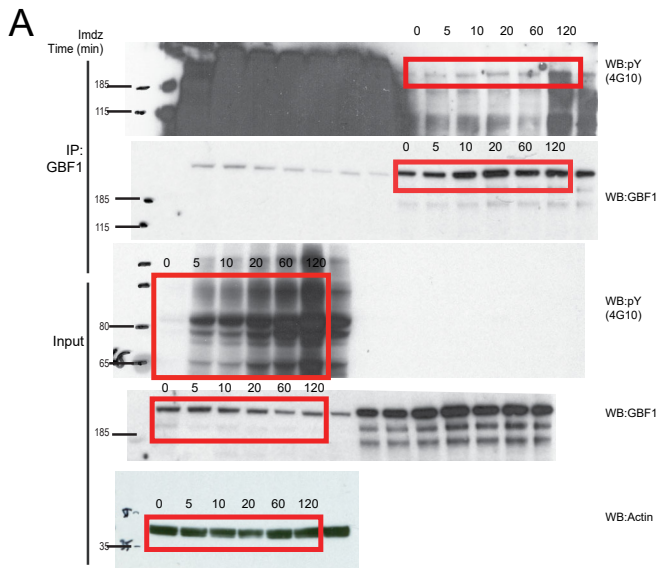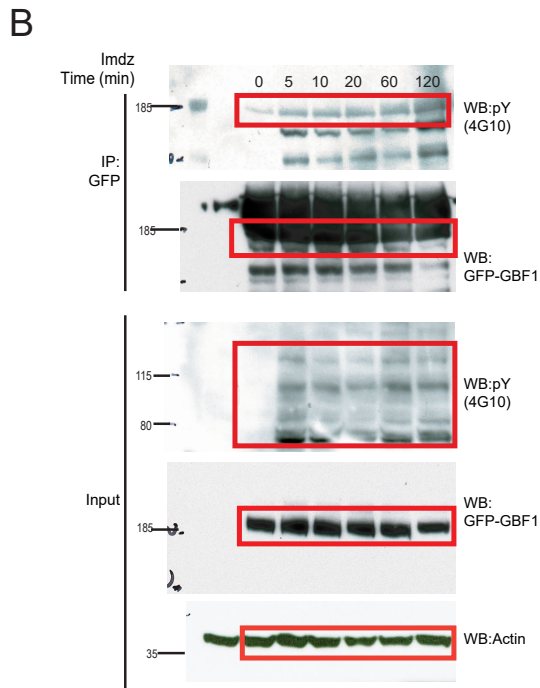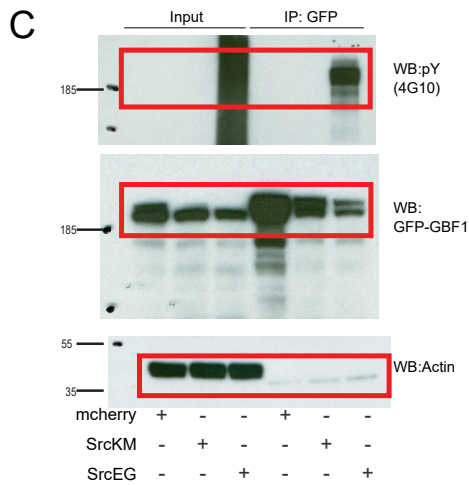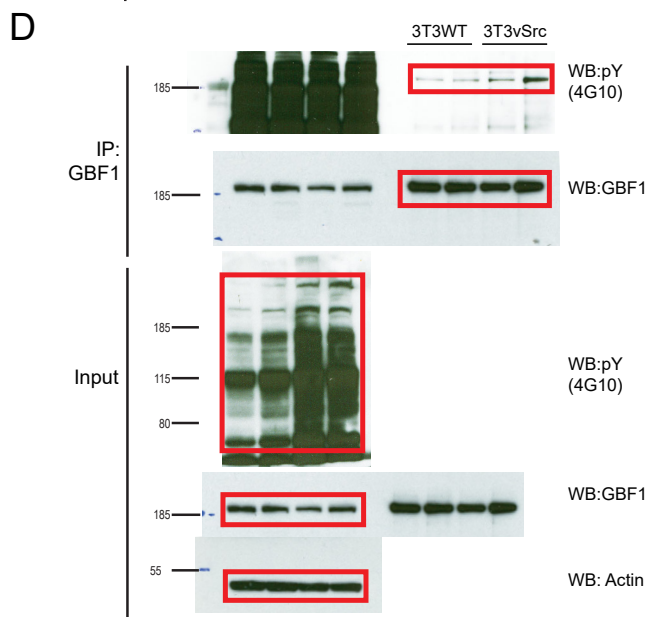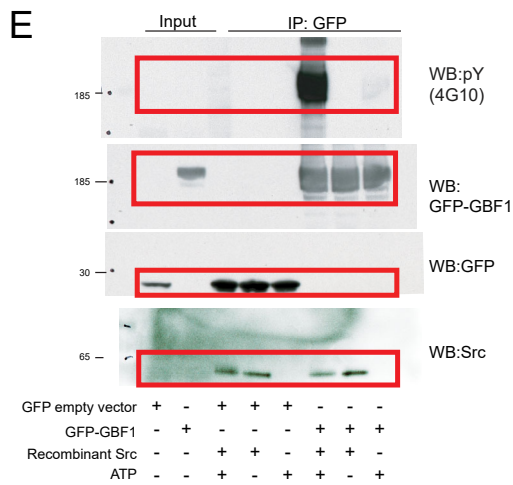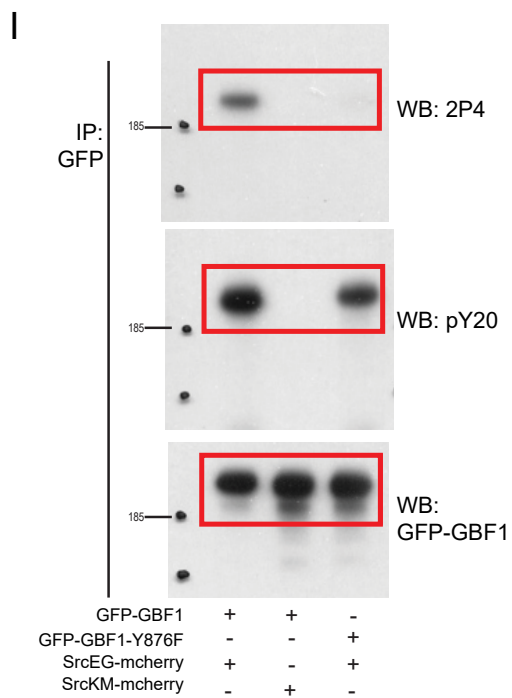

Figure 4- page 1

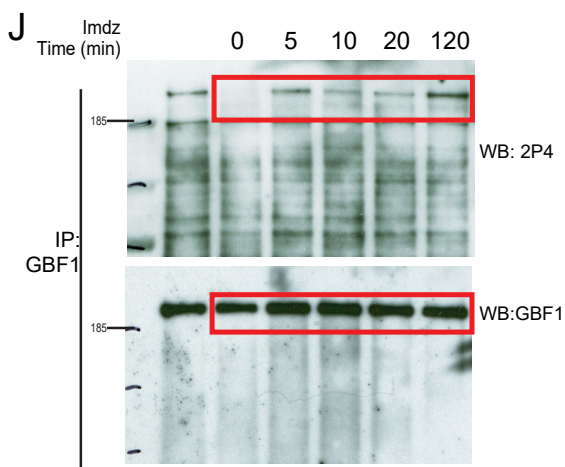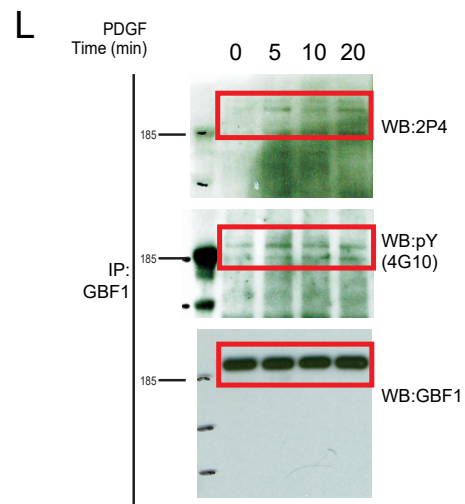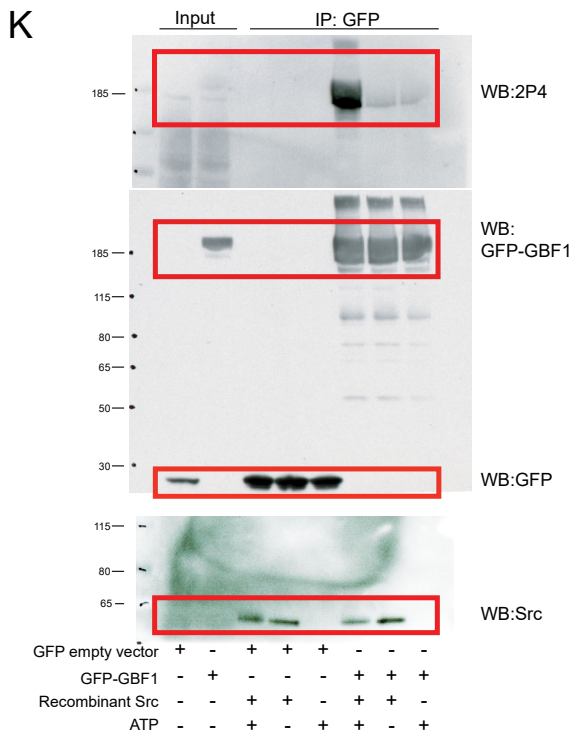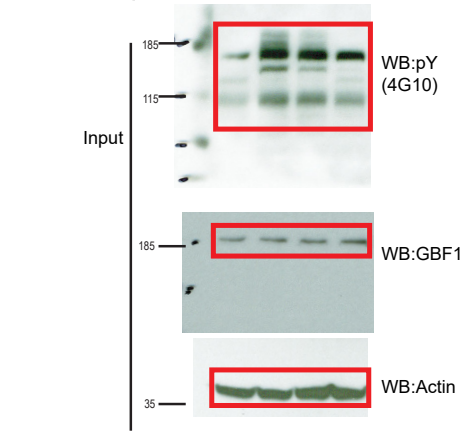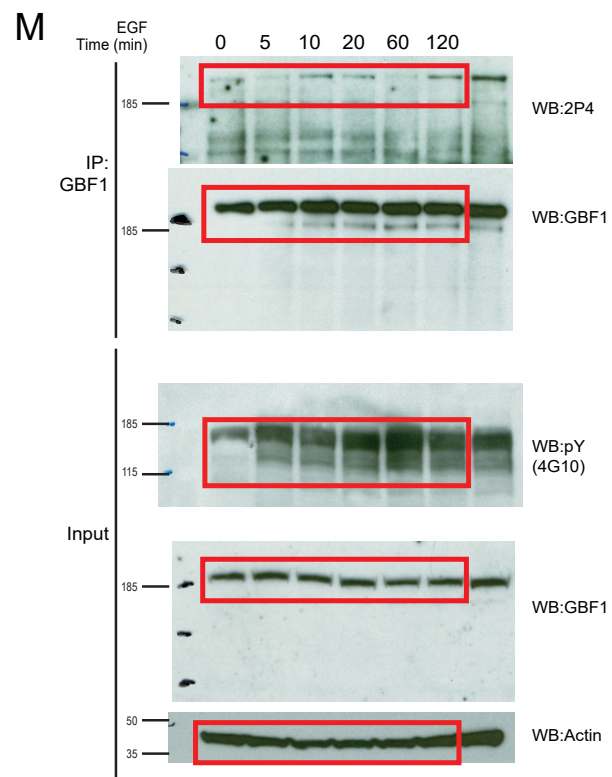

Figure 4-page2

**A**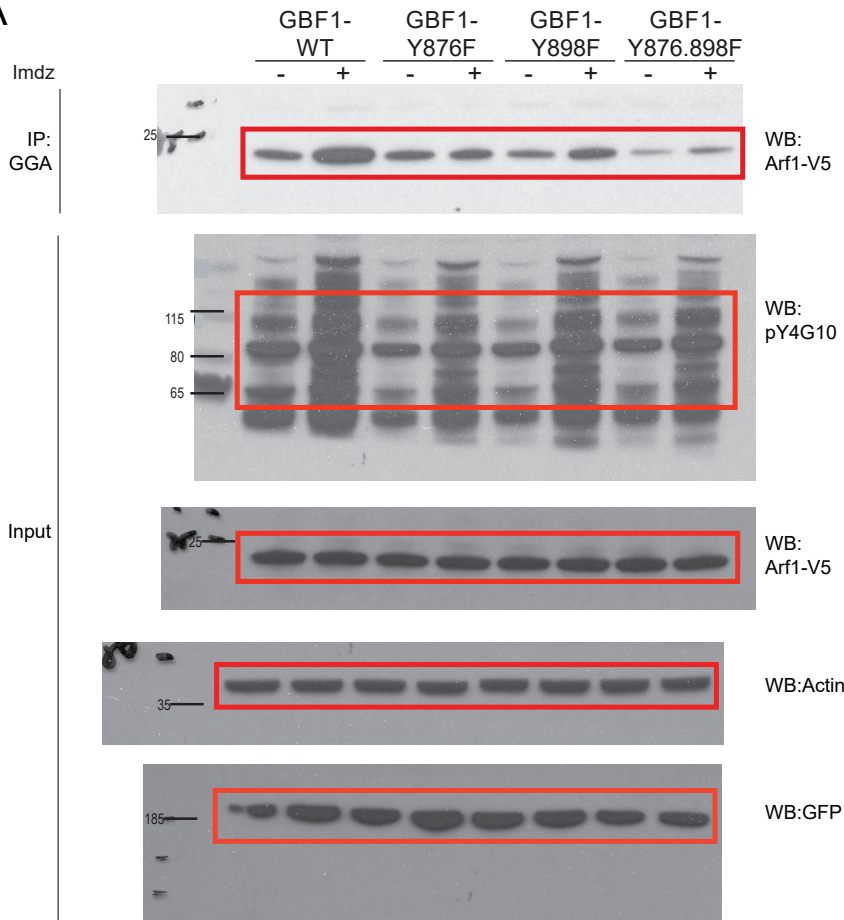**G**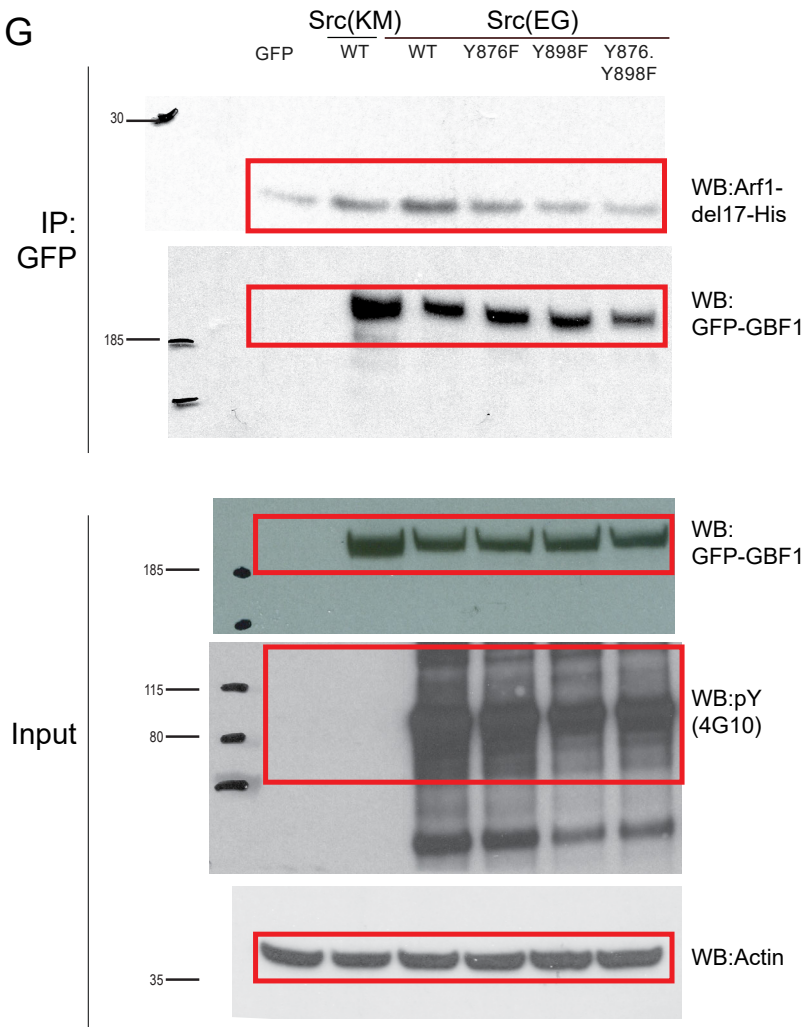

Figure 5

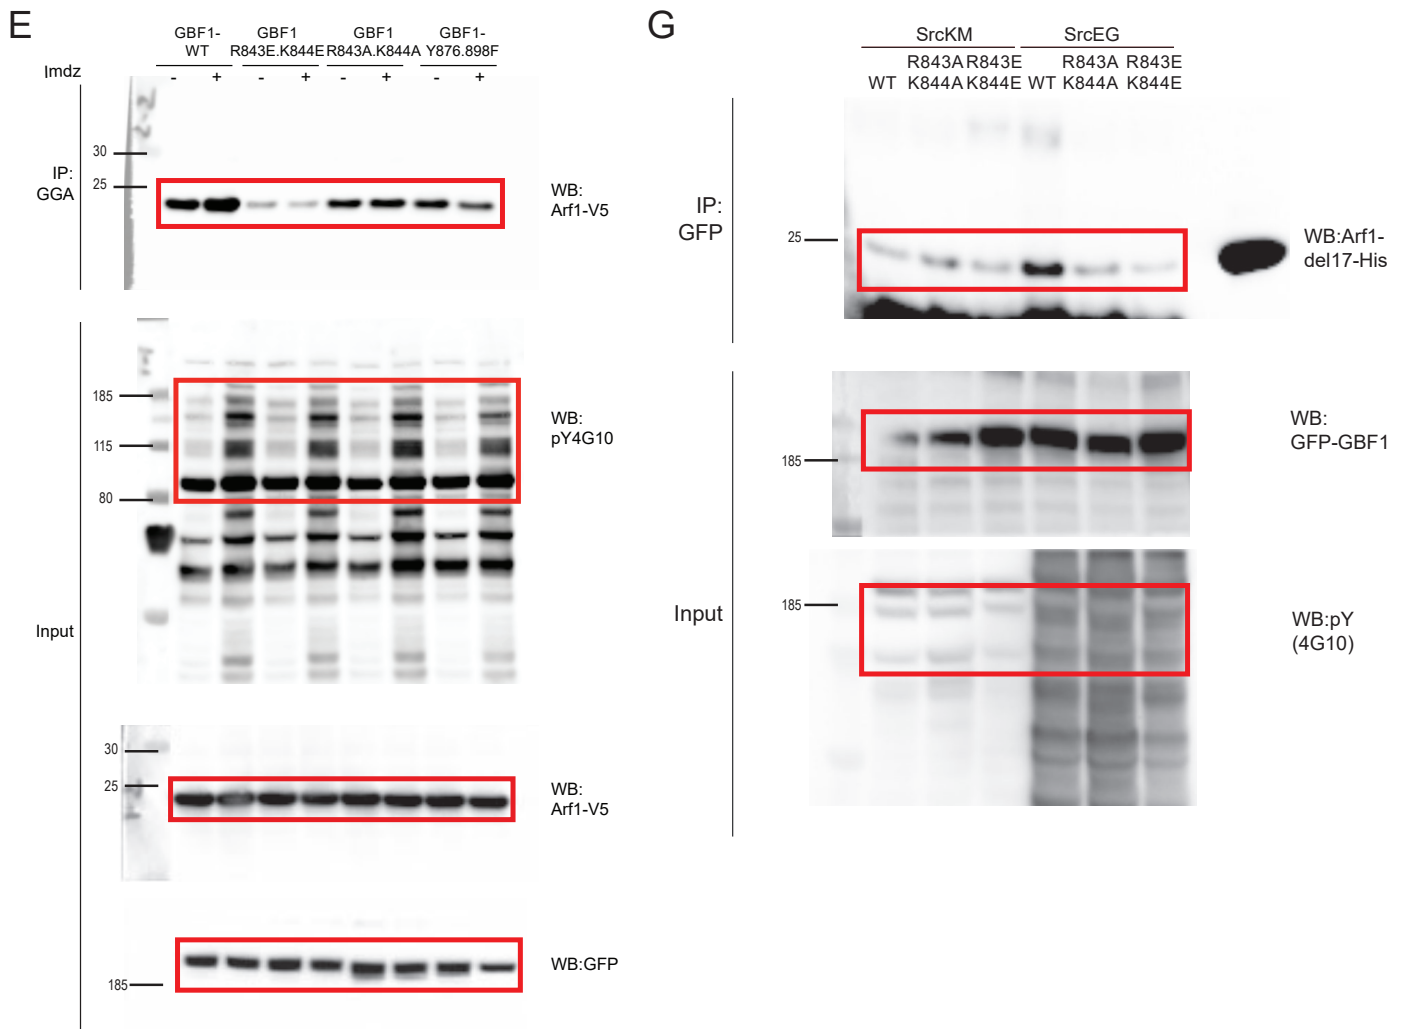

Figure 6

B

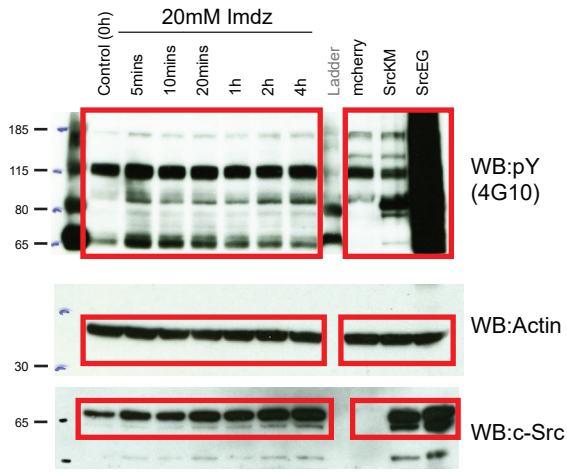

Figure 1- Supplement 1



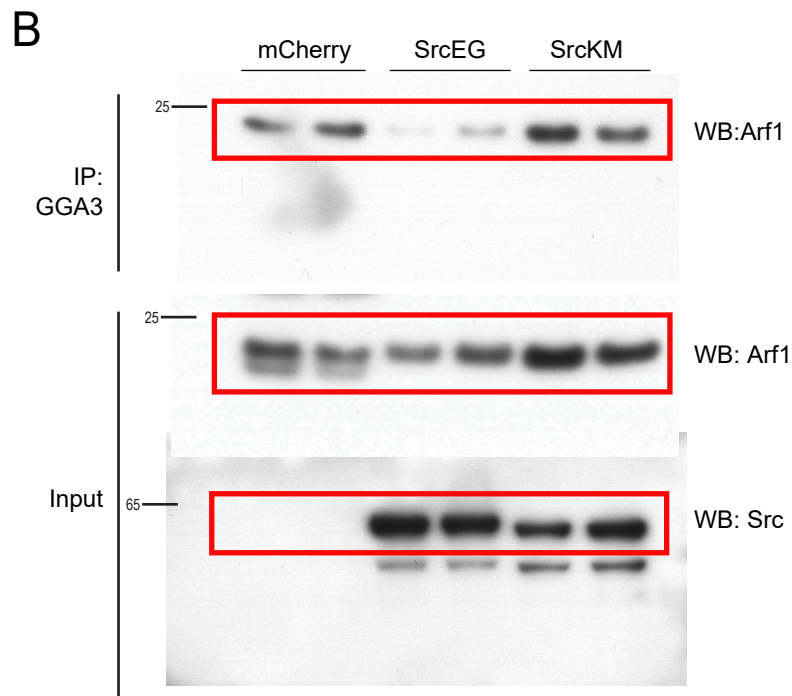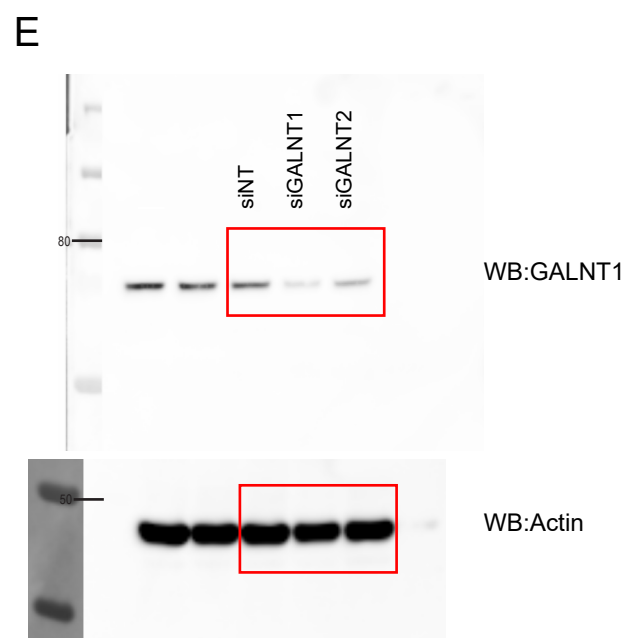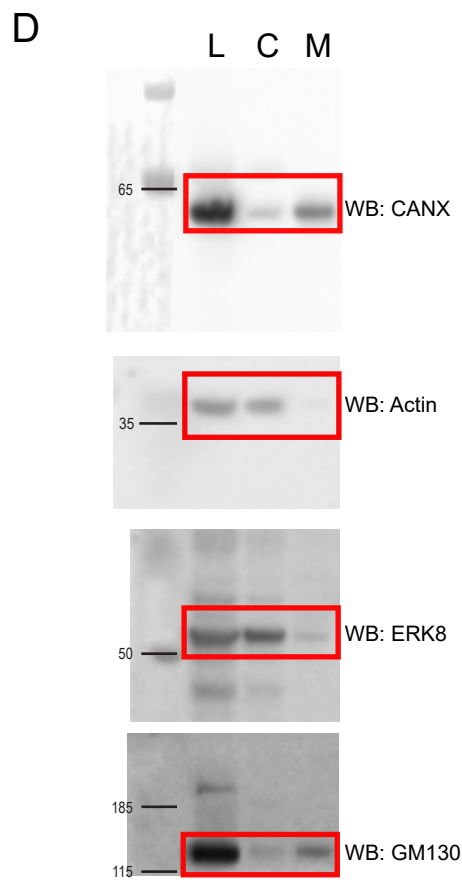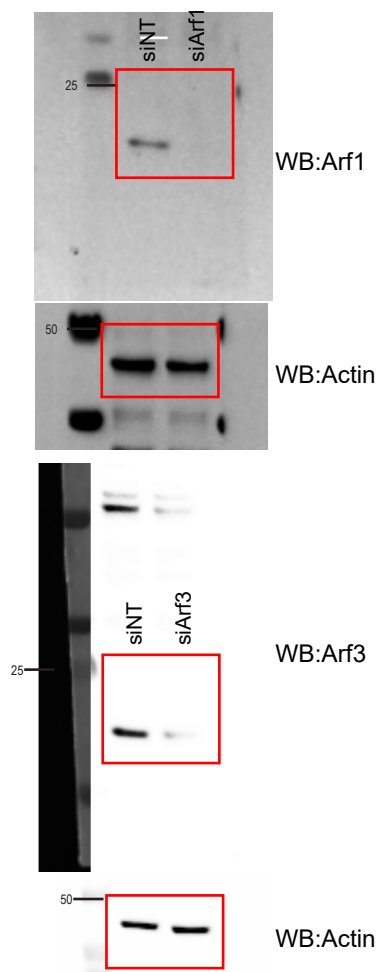

Figure 2- Supplement 1

**C**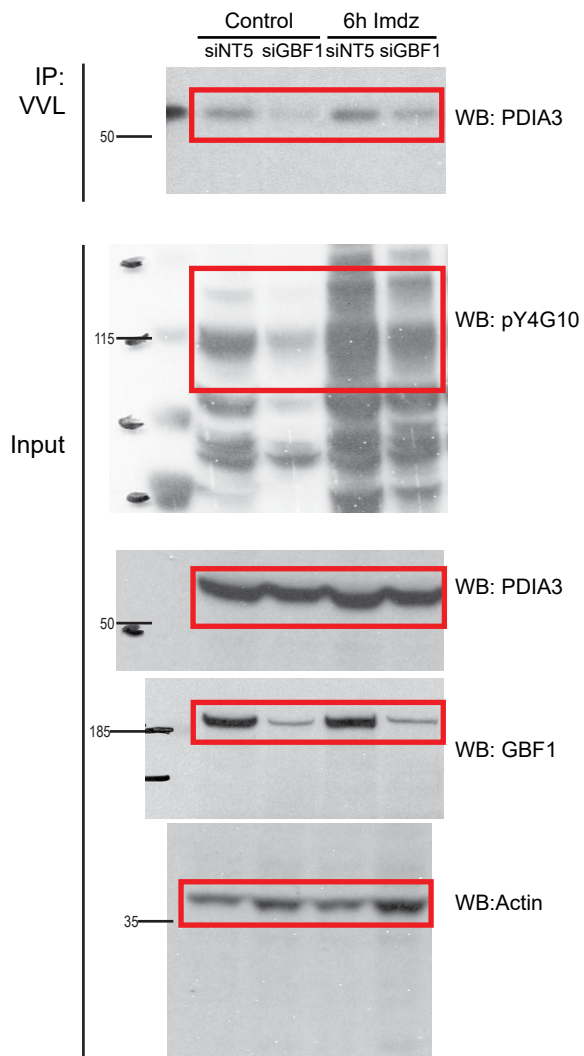**F**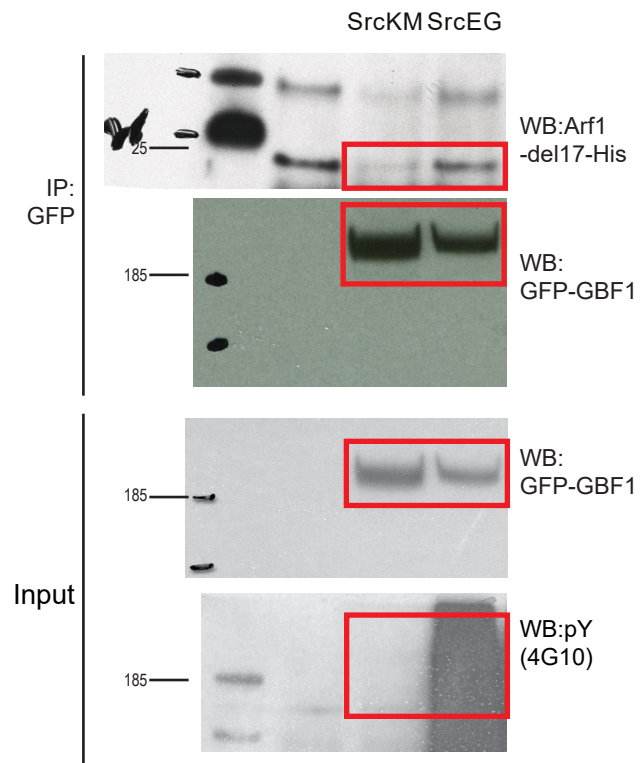

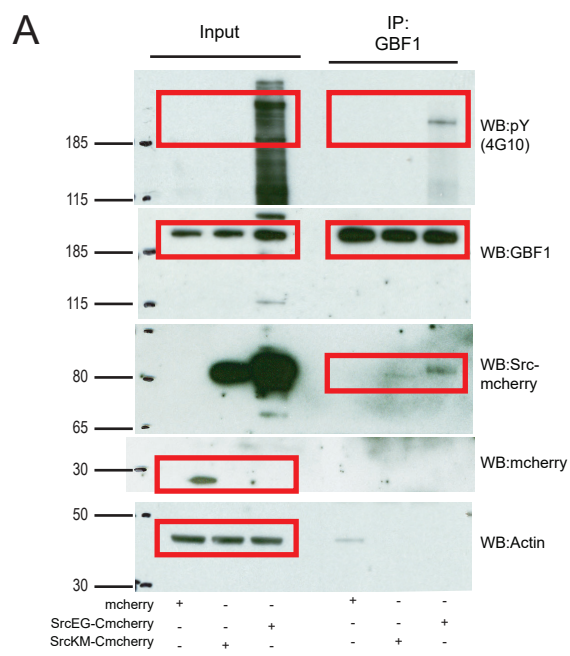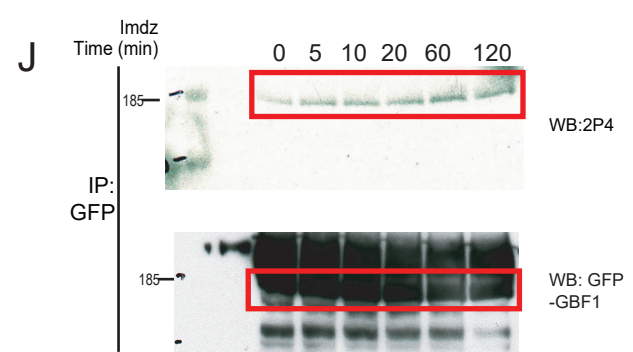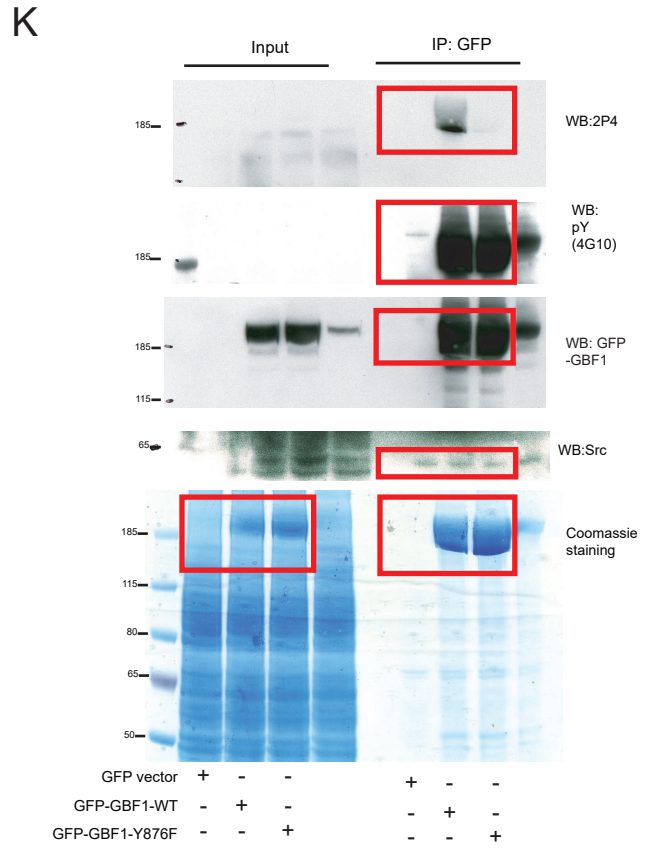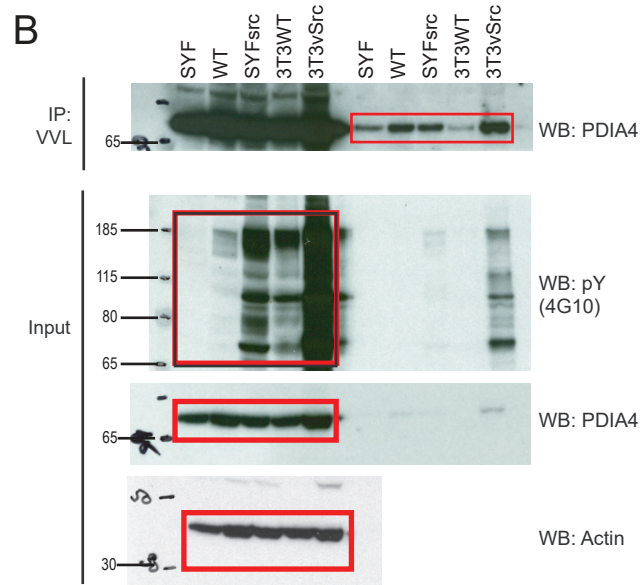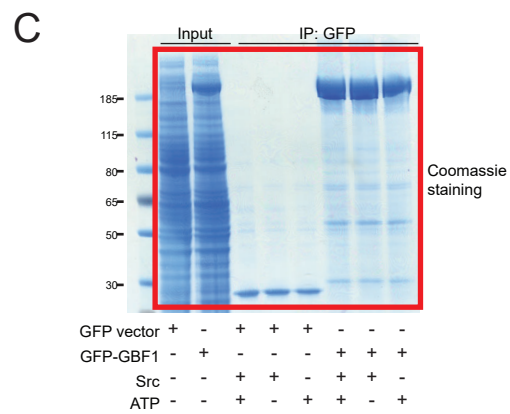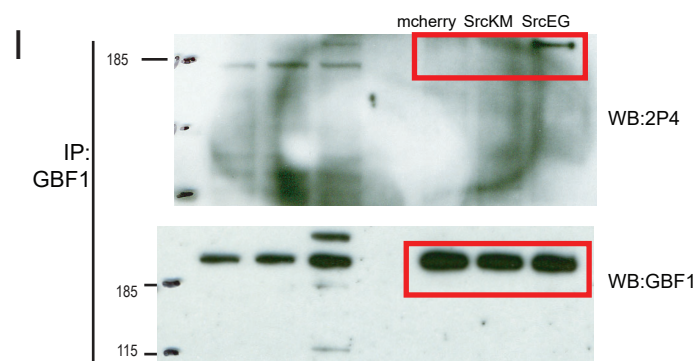

Figure 4- Supplement 1

A

|        |      |       |       |       |       |
|--------|------|-------|-------|-------|-------|
| Empty  | GBF1 | GBF1  | GBF1  | GBF1  | GBF1  |
| vector | WT   | Y876F | Y876E | Y898F | Y898E |
| GFP    |      |       |       |       |       |

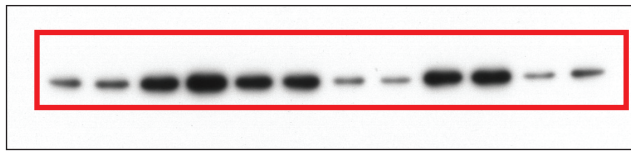

WB: ARF1-GTP

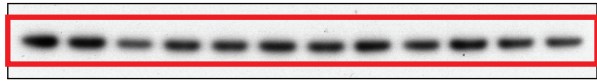

WB: Total ARF1

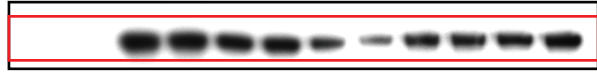

WB: GBF1
