# Supplementary material for: Src activates retrograde membrane traffic through phosphorylation of GBF1
Source: eLife. 2021 Dec 6;10:e68678. doi: 10.7554/eLife.68678 (PMC8727025; doi:10.7554/eLife.68678)
Supplement: Source data 2. [file elife-68678-supp2.xlsx]

## Sheet: Figure 1
Figure 1C- Mean HPL intensity per cell
	Raw				Normalised to 0mins
Time	1	2	3	Average	1	2	3	Average	Stdev	ttest wrt 0mins
0h	2364720	1960370	2051040	2.12538e+06	1.11261	0.922364	0.965024	1	0.0705908	1
5mins	2158670	2135790	1998110	2.09752e+06	1.01566	1.0049	0.94012	0.986895	0.0288951	0.843619
10mins	2240540	2487140	1973010	2.23356e+06	1.05418	1.17021	0.928311	1.0509	0.0855484	0.604062
15mins	2371620	2418800	2440450	2410290	1.11586	1.13806	1.14824	1.13405	0.0117094	0.0834462
20mins	2570290	2547640	2539630	2552520	1.20933	1.19868	1.19491	1.20097	0.00529051	0.0254185
25mins	2821040	2747170	3193770	2920660	1.32731	1.29256	1.50268	1.37418	0.0796433	0.0125841
30mins	3155810	2956100	2767210	2.95971e+06	1.48482	1.39086	1.30199	1.39256	0.0646514	0.00737162
35mins	2955140	3469810	3478680	3301210	1.39041	1.63256	1.63674	1.55324	0.0997221	0.00517104
40mins	3093580	3645660	3312020	3350420	1.45554	1.7153	1.55832	1.57639	0.0925018	0.00372806
45mins	3823590	3544080	3125340	3497670	1.79902	1.66751	1.47049	1.64567	0.11692	0.00442239
1h	3393650	3390600	3201170	3.32847e+06	1.59673	1.59529	1.50617	1.56606	0.0366827	0.000954868
2h	3495050	3264010	4277490	3678850	1.64444	1.53573	2.01258	1.73092	0.176713	0.00927866
4hr	4273160	4221410	4008410	4167660	2.01054	1.98619	1.88598	1.9609	0.0466843	0.000155078
6hr	4476810	4298590	4022270	4265890	2.10636	2.02251	1.8925	2.00712	0.0761968	0.000287969
8hr	4794050	3869610	4373740	4345800	2.25562	1.82067	2.05787	2.04472	0.15399	0.00164624
Figure 1F- Number of tubules
Time/mins	0-10 (Unsti.)	10-20 (Unsti.)	0-10	10-20	20-30	30-40	40-50	50-60	60-70
Cell 1	2		5	9	21	9	16	12	13
Cell 2	1		4	8	10	6	4	4	1
Cell 3	1	4	2	12	16	14	6	4	5
Cell 4	7	4	5	7	16	19	13	18	11

## Sheet: Figure 2
Figure 2B- HPL intensity per cell
0h
	Raw				Normalised to 0h
	1	2	3	Average	1	2	3	Average	SD
siNT	1045.64	1072.43	959.58	1025.88	1.01926	1.04537	0.93537	1	0.0331829
siGALNT1 +T2	491.026	478.266	490.673	486.655	1.00898	0.982762	1.00826	1	0.00862159
siArf1	1872.93	1932.85	1826.16	1877.31	0.997665	1.02958	0.972752	1	0.0164472
siArf3	1446.18	1609.64	1472.91	1509.58	0.958004	1.06629	0.975711	1	0.0335347
4h
	Raw				Normalised to 0h
	1	2	3	Average	1	2	3	Average	SD	ttest wrt 0h
siNT	1356.15	1547.98	1275.54	1393.22	1.32193	1.50892	1.24336	1.35807	0.078763	0.0138114
siGALNT1 +T2	572.298	509.251	513.102	531.55	1.17598	1.04643	1.05434	1.09225	0.0419273	0.0974106
siArf1	2014.24	1924.23	1957.78	1965.42	1.07294	1.02499	1.04286	1.04693	0.0139895	0.095435
siArf3	1915.28	1828.92	1895.25	1879.82	1.26875	1.21154	1.25548	1.24526	0.0172876	0.00288888
Figure 2F- Quantification of Arf1-GTP band intensity
Replicate 1				Replicate 2
Time/mins	Mean band intensity-backgound	Normalised to 0min		Time/mins	Mean band intensity-backgound	Normalised to 0min
0	22.953	1		0	22.908	1
5	48.752	2.12399		5	50.866	2.22045
10	52.003	2.26563		10	64.833	2.83015
20	52.651	2.29386		20	52.9	2.30924
30	29.176	1.27112		30	32.416	1.41505
45	22.374	0.974775		45	33.109	1.4453
60	37.871	1.64994		60	31.958	1.39506
120	27.851	1.21339		120	20.108	0.877772

## Sheet: Figure 3
Figure 3B- Quantification of Arf1-GTP band intensity
Replicate 1					Replicate 2					Replicate 3
Expression	Time/mins	Mean band intensity-backgound	Normalised to 0min		Expression	Time/mins	Mean band intensity-backgound	Normalised to 0min		Expression	Time/mins	Mean band intensity-backgound	Normalised to 0min
GFP	0	5.804	0.13875		GFP	0	2.531	0.13875		GFP	0	-
GBF1-GFP	0	41.834	1		GBF1-GFP	0	49.446	1		GBF1-GFP	0	10.253	1
GBF1-GFP	5	58.225	1.39182		GBF1-GFP	5	124.148	2.51078		GBF1-GFP	5	21.609	2.10758
GBF1-GFP	10	78.81	1.88389		GBF1-GFP	10	124	2.50779		GBF1-GFP	10	37.402	3.64791
GBF1-GFP	20	70.329	1.68116		GBF1-GFP	20	105.532	2.13429		GBF1-GFP	20	3.619	0.35297
GBF1-GFP	45	19.51	0.466371		GBF1-GFP	45	56.962	1.152		GBF1-GFP	45	2.147	0.209402
GBF1-GFP	60	43.224	1.03324		GBF1-GFP	60	57.467	1.16222		GBF1-GFP	60	5.068	0.494294
GBF1-GFP	120	35.786	0.855436		GBF1-GFP	120	50.809	1.02757		GBF1-GFP	120	5.991	0.584317
GBF1-GFP	240	52.397	1.25251		GBF1-GFP	240	56.306	1.13874		GBF1-GFP	240	10.37	1.01141
Figure 3D- Quantification of Arf1-GTP band intensity
Replicate 1					Replicate 2					Replicate 2
Treatment	Time/mins	Mean band intensity-backgound	Normalised to 0min		Treatment	Time/mins	Mean band intensity-backgound	Normalised to 0min		Treatment	Time/mins	Mean band intensity-backgound	Normalised to 0min
siNT	0	2.481	1		siNT	0	25.124	1		siNT	0	6.356	1
siNT	10	32.226	12.9891		siNT	10	79.394	3.16009		siNT	10	35.923	5.65183
siNT	20	46.648	18.8021		siNT	20	111.715	4.44655		siNT	20	35.707	5.61784
siNT	45	23.857	9.61588		siNT	45	66.118	2.63167		siNT	45	72.228	11.3638
siNT	60	7.772	3.13261		siNT	60	48.558	1.93273		siNT	60	22.762	3.58118
siNT	120	20.298	8.18138		siNT	120	59.559	2.3706		siNT	120	30.097	4.73521
siGBF1	0	4.469	1		siGBF1	0	6.433	1		siGBF1	0	2.638	1
siGBF1	10	20.546	4.59745		siGBF1	10	4.588	0.713198		siGBF1	10	4.18	1.58453
siGBF1	20	3.64	0.8145		siGBF1	20	2.396	0.372455		siGBF1	20	5.512	2.08946
siGBF1	45	6.402	1.43254		siGBF1	45	1.176	0.182807		siGBF1	45	4.923	1.86619
siGBF1	60	3.368	0.753636		siGBF1	60	0.001	0.000155448		siGBF1	60	4.837	1.83359
siGBF1	120	5.245	1.17364		siGBF1	120	1.406	0.218561		siGBF1	120	25.968	9.84382
Figure 3F- Quantification of protein levels
Replicate 1 -Cytosolic fraction				Replicate 1 -Membrane fraction
Time/mins	Mean band intensity-backgound	Fold wrt 0min		Time/mins	Mean band intensity-backgound	Fold wrt 0min
0	39.184	1		0	9.658	1
10	43.587	1.11237		10	30.039	3.11027
15	42.587	1.08685		15	18.453	1.91064
20	43.327	1.10573		20	17.701	1.83278
30	39.886	1.01792		30	17.577	1.81994
45	37.45	0.955747		45	19.606	2.03003
60	37.815	0.965062		60	15.796	1.63554
120	40.709	1.03892		120	24.209	2.50663
Replicate 2 -Cytosolic fraction				Replicate 2 -Membrane fraction
Time/mins	Mean band intensity-backgound	Fold wrt 0min		Time/mins	Mean band intensity-backgound	Fold wrt 0min
0	18915.3	1		0	4218.37	1
5	18615.9	0.984173		5	7640.43	1.81123
10	19821.5	1.04791		10	11227.7	2.66163
20	16126.1	0.852546		20	4734.95	1.12246
30	17490.7	0.924688		30	2978.2	0.706008
45	17126.2	0.905415		45	6720.09	1.59305
60	19570.3	1.03463		60	10613	2.5159
120	8549.49	0.451988		120	3093.16	0.733259
Figure 3H- Quantification of the ratio of Golgi to total cytoplasmic levels of GBF1
Naïve			5mM imdz
Time (mins)	Enrichment of Golgi/ cytoplasm (integratedint/area)		Time (mins)	Enrichment of Golgi/ cytoplasm (integratedint/area)
-121	1.76989		0	2.05968
-119	1.69287		1.5	2.11776
-116	1.61129		3	2.50804
-106	1.71311		4.5	2.8159
-91	1.71658		6	2.84911
-76	1.94298		9	3.26049
-61	1.94249		12	3.14665
-46	1.94363		14	3.96061
-31	1.96966		15.5	3.6338
-16	1.85078		20	3.55657
-1	1.81821		24	3.53234
			28	3.41773
			31	3.21728
			40.5	2.92258
			42	2.77178
			50	2.69562
			56	2.48033
			60	2.47691
			75	2.50296
			90	2.51982
			106	2.56345
			120	2.55062

## Sheet: Figure 4
Figure 4A- Quantification of endogenous p-GBF1 over time of imdz treatment in HEK-IS cells
Replicate 1				Replicate 2				Replicate 3
Time/mins	Mean band intensity-backgound	Normalised to 0min		Time/mins	Mean band intensity-backgound	Normalised to 0min		Time/mins	Mean band intensity-backgound	Normalised to 0min
0	47.687	1		0	14.034	1		0	81.631	1
5	111.034	2.32839		5	37.616	2.68035		5	95.194	1.16615
10	70.322	1.47466		10	33.842	2.41143		10	166.824	2.04364
20	110.158	2.31002		20	41.226	2.93758		20	189.101	2.31653
60	56.032	1.175		60	60.596	4.3178		60	197.244	2.41629
120	51.78	1.08583		120	145.966	10.4009		120	197.468	2.41903
Figure 4B- Quantification of exogenous p-GBF1 over time of imdz treatment in HEK-IS cells
Replicate 1				Replicate 2				Replicate 3
Time/mins	Mean band intensity-backgound	Normalised to 0min		Time/mins	Mean band intensity-backgound	Normalised to 0min		Time/mins	Mean band intensity-backgound	Normalised to 0min
0	8.459	1		0	8.483	1		0	13.413	1
5	27.477	3.24826		5	89.62	10.5647		5	35.524	2.64848
10	32.056	3.78957		10	90.981	10.7251		10	64.805	4.83151
20	39.028	4.61378		20	92.617	10.918		20	24.3	1.81168
60	49.781	5.88497		60	83.764	9.87434		60	56.254	4.19399
120	111.226	13.1488		120	124.214	14.6427		120	66.244	4.93879
Figure 4D- Quantification of p-GBF1 levels in 3T3 cells
Replicate 1				Replicate 2
	Mean band intensity-backgound	Normalised to 3T3 WT			Mean band intensity-backgound	Normalised to 3T3 WT
3T3WT (1)	41.92	1.14914		3T3WT (3)	6.616	0.659358
3T3WT (2)	31.039	0.850861		3T3WT (4)	13.452	1.34064
3T3vSrc (1)	96.855	2.65505		3T3vSrc (3)	31.989	3.18806
3T3vSrc (2)	100.1	2.74401		3T3vSrc (4)	93.159	9.28433

## Sheet: Figure 5
Figure 5B- Quantification of Arf1-GTP band intensity
Replicate 1				Replicate 2				Replicate 3
	Mean band intensity- Background	Normalised to GBF1 WT-0mins			Mean band intensity- Background	Normalised to GBF1 WT-0mins			Mean band intensity- Background	Normalised to GBF1 WT-0mins
GBF1-WT-0mins	11.2179	1		GBF1-WT-0mins	38.429	1		GBF1-WT-0mins	41.995	1
GBF1-WT-10mins	22.5258	2.00802		GBF1-WT-10mins	109.168	2.84077		GBF1-WT-10mins	93.837	2.23448
GBF1-Y876F-0mins	7.22786	0.644315		GBF1-Y876F-0mins	70.507	1.83473		GBF1-Y876F-0mins	45.193	1.07615
GBF1-Y876F-10mins	11.6123	1.03515		GBF1-Y876F-10mins	51.008	1.32733		GBF1-Y876F-10mins	41.666	0.992166
GBF1-Y898F-0mins	3.52389	0.314131		GBF1-Y898F-0mins	33.74	0.877983		GBF1-Y898F-0mins	32.744	0.779712
GBF1-Y898F-10mins	9.22582	0.822419		GBF1-Y898F-10mins	41.639	1.08353		GBF1-Y898F-10mins	49.79	1.18562
GBF1-Y876.898F-0mins	2.97066	0.264814		GBF1-Y876.898F-0mins	24.636	0.641078		GBF1-Y876.898F-0mins	15.071	0.358876
GBF1-Y876.898F-10mins	2.87205	0.256024		GBF1-Y876.898F-10mins	28.568	0.743397		GBF1-Y876.898F-10mins	21.73	0.517443
Figure 5D- Number of tubules
		GBF1 WT					GBF1 Y876.898E
	Number of tubules	Time (minutes)	Tubules/min			Number of tubules	Time (minutes)	Tubules/min
Cell 1	2	45.3333	0.0441176		Cell 1	36	31.5333	1.14165
Cell 2	8	31.9333	0.250522		Cell 2	35	60.0167	0.583171
Cell 3	20	57.1833	0.349752		Cell 3	177	60.0167	2.94918
Cell 4	20	57.1833	0.349752		Cell 4	15	48	0.3125
Cell 5	2	32.4333	0.061665		Cell 5	20	30	0.666667
Cell 6	7	32.6	0.214724		Cell 6	40	34.1833	1.17016
average			0.211755		average			1.13722
SD			0.134334		SD			0.94793
ttest wrt GBF1 WT								0.0394261
Figure 5F- Mean HPL intensity per cell
	Raw				Normalised to GBF1-WT + SrcEG
	1	2	3	Average	1	2	3	Average	SD	ttest wrt GBF1-WT + SrcEG	ttest wrt corresponding SrcKM
GFP+ SrcEG	1962.04	1676.69	1926.23	1854.99	0.599167	0.512027	0.588231	0.566475	0.0474694	0.000389183	0.0240774
GBF1-WT + SrcEG	3451.97	3138.19	3233.68	3274.61	1.05416	0.958339	0.9875	1	0.0491188	1	0.000146269
GBF1-Y876F + SrcEG	2395.86	2167.39	2851.45	2471.57	0.731647	0.661877	0.870775	0.754766	0.106351	0.0222407	0.0709947
GBF1-Y898F + SrcEG	1755.93	2258.4	2662.51	2225.61	0.536225	0.689669	0.813076	0.679657	0.138697	0.0195881	0.182942
GBF1-Y876.898F + SrcEG	1758.47	1896.74	2497.68	2050.96	0.537001	0.579226	0.76274	0.626322	0.120013	0.00753763	0.316806
GFP+ SrcKM	1576.78	1480.93	1379.73	1479.15	0.481516	0.452246	0.421341	0.451701	0.0300912	7.92593e-05
GBF1-WT + SrcKM	1569.59	1348.02	1619.63	1512.41	0.479321	0.411658	0.494602	0.46186	0.0441428	0.000146269
GBF1-Y876F + SrcKM	2110.16	1400.6	1797.94	1769.57	0.6444	0.427715	0.549054	0.54039	0.108602	0.00261268
GBF1-Y898F + SrcKM	1926.89	1735.84	1704.94	1789.22	0.588433	0.53009	0.520654	0.546392	0.0367127	0.000213913
GBF1-Y876.898F + SrcKM	1899.61	1783.61	1654.73	1779.32	0.580102	0.544678	0.505321	0.543367	0.0374079	0.000214045
Figure 5H- Quantification of bound Arf1
Replicate 1				Replicate 2				Replicate 3				Replicate 4
	Mean band intensity- Background	Normalised to SrcEG+GBF1-WT (average 4 reps)			Mean band intensity- Background	Normalised to SrcEG+GBF1-WT (average 4 reps)			Mean band intensity- Background	Normalised to SrcEG+GBF1-WT (average 4 reps)			Mean band intensity- Background	Normalised to SrcEG+GBF1-WT (average 4 reps)
SrcKM+GBF1-WT	33.518	0.559837		SrcKM+GBF1-WT	9.066	0.151426		SrcKM+GBF1-WT	37.48	0.626013		SrcKM+GBF1-WT	37.141	0.62035
SrcEG+GBF1-WT	81.718	1.3649		SrcEG+GBF1-WT	33.734	0.563445		SrcEG+GBF1-WT	65.054	1.08657		SrcEG+GBF1-WT	58.978	0.985085
SrcEG+GBF1-Y876F	59.314	0.990697		SrcEG+GBF1-Y876F	12.687	0.211906		SrcEG+GBF1-Y876F	44.299	0.739907		SrcEG+GBF1-Y876F	35.193	0.587814
SrcEG+GBF1-Y898F	6.331	0.105744		SrcEG+GBF1-Y898F	9.978	0.166658		SrcEG+GBF1-Y898F	48.532	0.810609		SrcEG+GBF1-Y898F	20.856	0.348349
SrcEG+GBF1-Y876.898F	11.621	0.194101		SrcEG+GBF1-Y876.898F	12.065	0.201517		SrcEG+GBF1-Y876.898F	25.746	0.430025		SrcEG+GBF1-Y876.898F	18.357	0.306609
												GFP	9.783	0.163401

## Sheet: Figure 6
Figure 6C- Quantification of the binding free energy
	DelatG	error
Unphosphorylated GBF1	-90.94	12.4
pGBF1-Y876	-109.66	13.32
Figure 6F- Quantification of Arf1-GTP band intensity
Replicate 1				Replicate 2				Replicate 3
	Mean band intensity- Background	Normalised to GBF1 WT-0mins			Mean band intensity- Background	Normalised to GBF1 WT-0mins			Mean band intensity- Background	Normalised to GBF1 WT-0mins
GBF1-WT-0mins	49.495	1		GBF1-WT-0mins	25674.1	1		GBF1-WT-0mins	26.925	1
GBF1-WT-10mins	83.54	1.68785		GBF1-WT-10mins	34784.4	1.35484		GBF1-WT-10mins	80.289	2.98195
GBF1-R843A.K844A-0min	29.704	0.600141		GBF1-R843A.K844A-0min	20763.1	0.808717		GBF1-R843A.K844A-0min	50.211	1.86485
GBF1-R843A.K844A-10min	47.247	0.954581		GBF1-R843A.K844A-10min	22723.8	0.885085		GBF1-R843A.K844A-10min	49.622	1.84297
GBF1-R843E.K844E-0min	4.385	0.0885948		GBF1-R843E.K844E-0min	7782.31	0.303119		GBF1-R843E.K844E-0min	39.741	1.47599
GBF1-R843E.K844E-10min	15.595	0.315082		GBF1-R843E.K844E-10min	6361.04	0.247761		GBF1-R843E.K844E-10min	41.609	1.54537

## Sheet: Figure S1
Figure S1E- Mean HPL intensity per cell
	Raw				Normalised to 0mins
Time	1	2	3	Average	1	2	3	Average	Stdev	ttest wrt 0mins
0mins	2594740	2528630	2528160	2550510	1.01734	0.991421	0.991237	1	0.0106197	1
5mins	2666030	2408270	2453280	2.50919e+06	1.04529	0.944231	0.961878	0.983801	0.0381696	0.642835
10mins	2526060	2343530	2341480	2403690	0.990414	0.918848	0.918044	0.942435	0.0293822	0.0870051
15mins	2910340	2730820	2765400	2.80219e+06	1.14108	1.0707	1.08425	1.09868	0.0264061	0.0131978
20mins	2764210	2649310	2427610	2613710	1.08379	1.03874	0.951814	1.02478	0.0474362	0.56626
25mins	2495050	2778600	2645460	2.6397e+06	0.978255	1.08943	1.03723	1.03497	0.0393302	0.352421
30mins	2931680	2804050	2906780	2.88084e+06	1.14945	1.09941	1.13969	1.12951	0.0187567	0.0018163
35mins	2747350	2842350	2791630	2.79378e+06	1.07718	1.11442	1.09454	1.09538	0.013179	0.00231117
40mins	2635600	2986960	2904770	2.84244e+06	1.03336	1.17112	1.1389	1.11446	0.0509528	0.0544658
45mins	3362640	3109870	3082830	3.18511e+06	1.31842	1.21931	1.20871	1.24881	0.0427883	0.00229824
1h	3035570	2849560	2735640	2873590	1.19018	1.11725	1.07259	1.12667	0.0419749	0.0231024
2h	2532320	2668810	2819360	2.6735e+06	0.992868	1.04638	1.10541	1.04822	0.0398056	0.225006
4hr	2877440	2743050	2675740	2765410	1.12818	1.07549	1.0491	1.08426	0.0284705	0.0273773
6hr	2729410	2701330	2610310	2680350	1.07014	1.05913	1.02345	1.05091	0.0172611	0.0370588
8hr	2893940	2758970	2556510	2.73647e+06	1.13465	1.08173	1.00235	1.07291	0.0470856	0.137981
24hr	2450120	2326050	1973000	2.24972e+06	0.960639	0.911994	0.773571	0.882068	0.0686306	0.106047
32hr	2576570	2457240	2555680	2529830	1.01022	0.963431	1.00203	0.991892	0.0176676	0.655161
48hr	1704370	2235070	2300400	2.07995e+06	0.668247	0.876323	0.901937	0.815502	0.0906288	0.0684798
No serum starve	3015010	3045700	2969650	3010120	1.18212	1.19415	1.16434	1.1802	0.0106073	0.000124492
Figure S1G- Mean HPL intensity per cell
	Raw				Normalised to 0mins
Time	1	2	3	Average	1	2	3	Average	Stdev	ttest wrt 0h
0hr	769309	827298	837155	811254	0.948296	1.01978	1.03193	1	0.0451871	1
1h imdz	1109090	1058350	1075100	1.08085e+06	1.36713	1.30459	1.32523	1.33232	0.0318686	0.000481032
2h imdz	1089290	1151100	1196290	1145560	1.34272	1.41891	1.47462	1.41209	0.0662119	0.00087935
4h imdz	1132830	1212220	1147410	1.16415e+06	1.39639	1.49425	1.41437	1.435	0.0520928	0.000398528
6h imdz	1268400	1355670	1405470	1343180	1.56351	1.67108	1.73247	1.65568	0.085526	0.000301057
0h wash	1419690	1443240	1396920	1419950	1.74999	1.77902	1.72193	1.75031	0.0285497	1.69771e-05
0.5h wash	1295670	1184600	1286970	1.25575e+06	1.59712	1.46021	1.5864	1.54791	0.0761391	0.000429353
1h wash	1295290	1022780	1052990	1.12369e+06	1.59665	1.26074	1.29798	1.38512	0.184133	0.0244881
2h wash	1016170	1033650	1013420	1021080	1.25259	1.27414	1.2492	1.25864	0.0135253	0.000685885
3h wash	1018070	1040120	1025060	1027750	1.25493	1.28211	1.26355	1.26687	0.0138901	0.000613092
4h wash	1056070	1051050	1118970	1.07536e+06	1.30177	1.29559	1.37931	1.32556	0.0466535	0.000968798
6h wash	1028150	1030640	1100440	1.05308e+06	1.26736	1.27043	1.35647	1.29809	0.0505843	0.00159882
8h wash	996951	910133	1060040	989041	1.2289	1.12188	1.30667	1.21915	0.0927772	0.0212367
Figure S1N- Quantification of Mean BCOP intensity at the Golgi region
	Raw				Normalised to 0mins
Time	1	2	3	Average	1	2	3	Average	Stdev	ttest wrt 0h
0mins	22225.8	NaN	22178.1	22201.9	1.00107	NaN	0.998926	1	0.00151919	1
10mins	31585.3	NaN	5291.71	18438.5	1.42264	NaN	0.238344	0.83049	0.15	0.801605
15mins	11209.2	17909	12716.5	13944.9	0.504875	0.806641	0.572765	0.628093	0.158309	0.0511951
20mins	14281.7	13357.8	9907.43	12515.6	0.643263	0.60165	0.446241	0.563718	0.103844	0.011049
25mins	11015.5	11952.8	5199.51	9389.27	0.49615	0.538367	0.234192	0.422903	0.164786	0.0182372
30mins	11143.5	13411.2	10926.7	11827.1	0.501915	0.604055	0.49215	0.532707	0.0619819	0.00205923
35mins	12974.9	12159.9	11087	12073.9	0.584404	0.547695	0.499371	0.543823	0.0426486	0.00073408
40mins	9501.73	10985.9	4123.01	8203.55	0.427968	0.494817	0.185705	0.369497	0.16264	0.0138113
45mins	13488.7	10666	10758.5	11637.7	0.607546	0.480408	0.484575	0.524176	0.0722302	0.00305392
1h	11616	11475	11926.9	11672.6	0.523197	0.516846	0.537201	0.525748	0.010414	9.81439e-06
2h	11161.5	11339.3	4542.2	9014.33	0.502726	0.510734	0.204586	0.406015	0.174489	0.0196908
4hr	12765.4	10861	13016.3	12214.2	0.574968	0.489191	0.586268	0.550142	0.0530868	0.0014608
6hr	15702	10087.7	10798.8	12196.2	0.707235	0.454361	0.48639	0.549329	0.137686	0.0218785
8hr	8431.09	10513.2	4982.68	7975.66	0.379745	0.473526	0.224425	0.359232	0.125811	0.00641429
24hr	12836.1	13941.1	13790.1	13522.4	0.578152	0.627922	0.621121	0.609065	0.0269867	0.000298264

## Sheet: Figure S3
Figure S3B- Mean HPL intensity per cell
0h
	Raw				Normalised to 0mins
Time	1	2	3	Average	1	2	3	Average	Stdev
siNT	1045.64	1072.43	959.58	1025.88	1.01926	1.04537	0.93537	1	0.0331829
siGALNT1 +T2	491.026	478.266	490.673	486.655	1.00898	0.982762	1.00826	1	0.00862159
siGBF1	1527.42	1957.72	844.871	1443.34	1.05826	1.35638	0.585359	1	0.224474
4h
	Raw				Normalised to 0mins
Time	1	2	3	Average	1	2	3	Average	Stdev	ttest wrt 0mins
siNT	1356.15	1547.98	1275.54	1393.22	1.32193	1.50892	1.24336	1.35807	0.078763	0.0138114
siGALNT1 +T2	572.298	509.251	513.102	531.55	1.17598	1.04643	1.05434	1.09225	0.0419273	0.0974106
siGBF1	1603.92	1182.93	1539.92	1571.92	1.11126	0.81958	1.06692	1.08909	0.0907432	0.997681
Figure S3E- Quantification of Arf1-GTP band intensity
Replicate 1				Replicate 2
	Mean band intensity-backgound	Normalised to GBF1-WT+SrcKM			Mean band intensity-backgound	Normalised to GBF1-WT+SrcKM
GFP+SrcEG	0.001	5.06753e-05		GFP+SrcEG	8.194	0.265453
GBF1-WT+SrcKM	53.156	1		GBF1-WT+SrcKM	30.868	1
GBF1-WT+SrcEG	99.056	2.03271		GBF1-WT+SrcEG	57.909	1.87602
Figure S3G- Number of tubules
	Cell 1	Cell 2	Cell 3	Cell 4	average	SD	ttest wrt siNT
siNT	27	10	36	10	20.75	12.9454
siGBF1	1	2	0		1	1	0.049812

## Sheet: Figure S5
Figure S5D- Number of tubules
	GBF1 WT			GBF1 Y876.898E
	Number of tubules for 1st 30 mins			Number of tubules for 1st 30 mins
Cell 1	1		Cell 1	36
Cell 2	8		Cell 2	21
Cell 3	12		Cell 3	70
Cell 4	9		Cell 4	13
Cell 5	2		Cell 5	20
Cell 6	7		Cell 6	39
average	6.5		average	33.1667
SD	4.23084		SD	20.6244
ttest wrt GBF1 WT				0.0112028
Figure S5F- Mean HPL intensity per cell
0h
	Raw				Normalised to 0h
	1	2	3	Average	1	2	3	Average	SD
GBF1 wt	1609100	1602670	1646120	1.6193e+06	0.993703	0.989732	1.01656	1	0.0144823
GBF1 -Y876F	1527060	1592580	1844920	1.65485e+06	0.922777	0.962369	1.11485	1	0.101417
GBF1 -Y898F	961763	994287	1063380	1.00648e+06	0.955574	0.987889	1.05654	1	0.0515597
GBF1 -Y876.898F	1273830	2395420	1697860	1.78904e+06	0.71202	1.33894	0.949036	1	0.316554
4h
	Raw				Normalised to 0h
	1	2	3	Average	1	2	3	Average	SD	ttest wrt 0h	ttest wrt GBF1 WT
GBF1 wt	2409090	2290860	2523690	2407880	1.48774	1.41473	1.55851	1.48699	0.0718952	0.000326284
GBF1 -Y876F	1917160	2090150	2120940	2042750	1.15851	1.26304	1.28165	1.2344	0.0663795	0.028582	0.011066
GBF1 -Y898F	1267250	1381890	1199330	1.28282e+06	1.2591	1.373	1.19161	1.27457	0.0916772	0.010647	0.0342494
GBF1 -Y876.898F	2042430	1705230	2190300	1979320	1.14164	0.953155	1.22429	1.10636	0.138967	0.622349	0.0135471
Figure S5H- Mean HPL intensity per cell
				Average	SD	ttest wrt GFP
GFP	643.091	643.144	641.636	642.624	0.855755	1
GBF1-WT	618.266	642.505	661.538	640.77	21.6881	0.889542
GBF1-Y876E	739.366	768.191	697.953	735.17	35.3065	0.010507
GBF1-Y898E	692.362	697.85	733.89	708.034	22.5595	0.00739365
GBF1-Y876.898E	858.98	710.318	738.769	769.356	78.9098	0.0497384
GBF1-Y876.898F	631.291	655.401	625.337	637.343	15.9195	0.59688
SrcKM	611.491	695.456	519.723	608.89	87.8954	0.542593
SrcEG	718.382	711.366	695.856	708.535	11.5268	0.000589627

## Sheet: Figure S7
Figure S7D- Mean HPL intensity per cell
	Raw							Normalised to SrcKM
	1	2	3	4	5	6	Average	1	2	3	4	5	6	Average	SEM	ttest wrt GBF1WT+SrcEG
GBF1-WT+ SrcKM	1309.91	1331.54	1275.75	1150.06	1183.16	1177.34	1237.96	1.05812	1.07559	1.03053	0.928996	0.955734	0.951032	1	0.0278732	9.11298e-11
GBF1-WT+SrcEG	3039.38	2990.36	3019.29	2876.42	2759.29	2764.01	2908.12	2.45515	2.41555	2.43892	2.32352	2.2289	2.23271	2.34913	0.0457732	1
GBF1-Y876F -SrcEG	2667.73	2687.94	2619.06	2483.51	2499.21	2460.81	2569.71	1.83283	1.84672	1.79939	1.70626	1.71705	1.69067	1.76549	0.0308116	0.000444216
GBF1-Y876.898F -SrcEG	2567.18	2604.04	2363.27	2407.82	2247.74	2521.79	2451.97	1.64155	1.66512	1.51116	1.53965	1.43729	1.61252	1.56788	0.0389585	0.000131134
GBF1-R843A.K844A +SrcEG	2540.5	2555.65	2496.79	2509.23	2306.75	2765.45	2529.06	1.83856	1.84952	1.80692	1.81593	1.66939	2.00135	1.83028	0.0474725	0.000734194
GBF1-R843E.K844E+SrcEG	2176.62	2357.37	2453.22	2415.63	2345.45	2617.65	2394.32	1.51611	1.64201	1.70877	1.68259	1.6337	1.8233	1.66775	0.0451295	6.5634e-05
Figure S7F- Mean HPL intensity per cell
	Raw				Normalised to 0h
	1	2	3	Average	1	2	3	Average	SEM	ttest wrt 0h
GBF1-WT-0h	3639270	4254460	3465330	3.78635e+06	0.961154	1.12363	0.915216	1	0.0632215
GBF1-WT-4h Imdz	6366050	6608140	7650150	6874780	1.68131	1.74525	2.02045	1.81567	0.10404	0.00258206
GBF1-Y876.898F-4h Imdz	5921460	7446410	6386770	6584880	1.20592	1.51648	1.30068	1.34102	0.0918923	0.0232415
GBF1-R843A.K844A-4h Imdz	5158740	5612680	5660540	5477320	1.3111	1.42647	1.43863	1.39206	0.0406356	0.00361687
GBF1-R843E.K844E-4h Imdz	4631030	5346130	4828240	4.93513e+06	1.21561	1.40332	1.26738	1.29544	0.0559734	0.00761679
